# Supplementary material for: NH3 plasma-etching-derived porous N-doped carbon nanotubes with FeP nanoparticles and intrinsic carbon defects for boosting oxygen reduction in rechargeable Zn–air batteries
Source: Royal Society of Chemistry journal article supplement (doi:10.1039/d4qi00182f), 2024-01-01
Supplement: d4qi00182f1.pdf [file d4qi00182f1.pdf]

## Supporting Information

### **NH<sub>3</sub> Plasma Etching Derived Porous N-Doped Carbon Nanotubes with FeP Nanoparticles and Intrinsic Carbon Defects for Boosting Oxygen Reduction in Rechargeable Zn-air Batteries**

Bing Chen,<sup>a,b</sup> Minjie Zhou,<sup>\*a,b</sup> Na Zhang,<sup>c</sup> Xianglin Deng,<sup>a,b</sup> HaiHua Yang<sup>\*a,b</sup>

*<sup>a</sup> Key Laboratory of Hunan Province for Advanced Carbon-Based Functional Materials, Hunan Institute of Science and Technology, Yueyang, Hunan Province, 414006, P.R. China*

*<sup>b</sup> School of Chemistry and Chemical Engineering, Hunan Institute of Science and Technology, Yueyang, Hunan Province, 414006, P.R. China*

*<sup>c</sup> School of Physics and Electronic Science, Hunan Institute of Science and Technology, Yueyang, Hunan Province, 414006, P.R. China*

*\*Corresponding Author E-mail: hhyang@126.com (Haihua Yang); zmj0104@126.com (Minjie Zhou)*

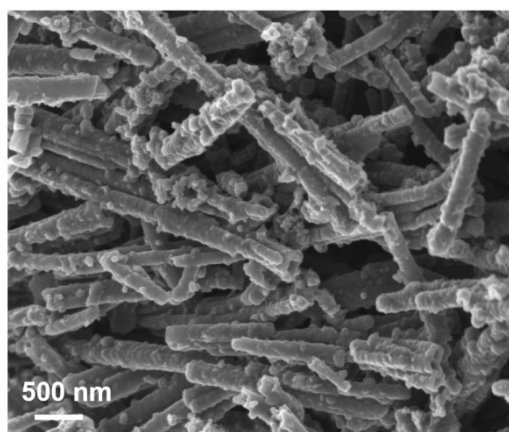

Fig. S1 SEM image of NS-CNTs

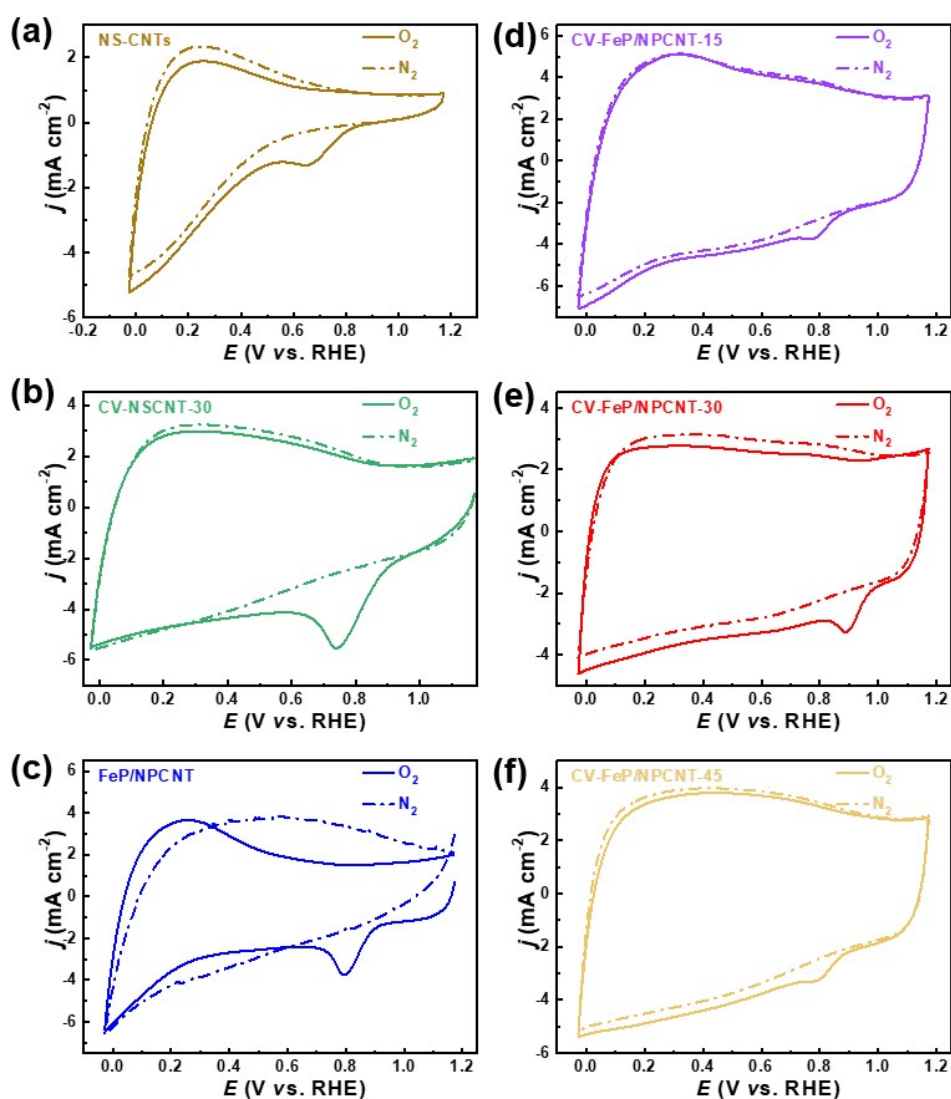

Fig. S2 CV curves of NS-CNTs (a), CV-NSCNT-30 (b), FeP/NPCNT (c), CV-FeP/NPCNT-15 (d), CV-FeP/NPCNT-30 (e) and CV-FeP/NPCNT-45 (f) in the  $N_2$  or  $O_2$  saturated  $0.1 \text{ mol L}^{-1}$  KOH electrolyte

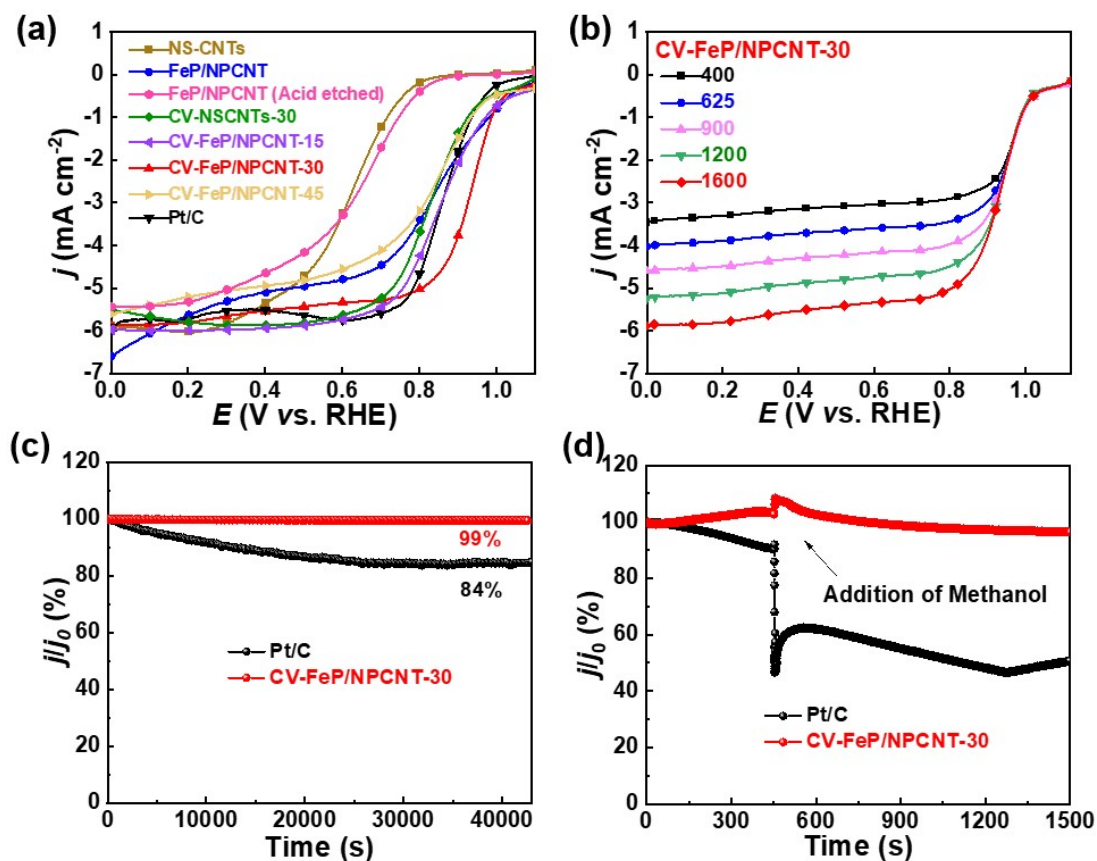

Fig. S3 LSV curves of different CNTs based electrodes (a), LSV curve of CV-FeP/NPCNT-30 (b) at various rotation rates. i-t chronoamperometric responses of CV-FeP/NPCNT-30 and Pt/C in O<sub>2</sub> saturated 0.1 mol L<sup>-1</sup> KOH electrolyte (c), and with addition of methanol (d).

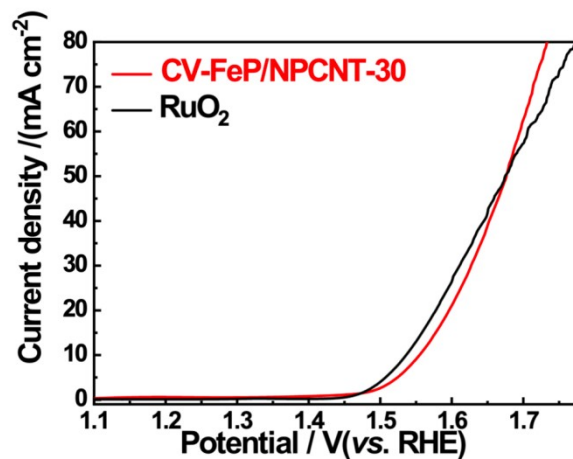

Fig. S4 LSV curve for OER driven by CV-FeP/NPCNT-30 and RuO<sub>2</sub>.

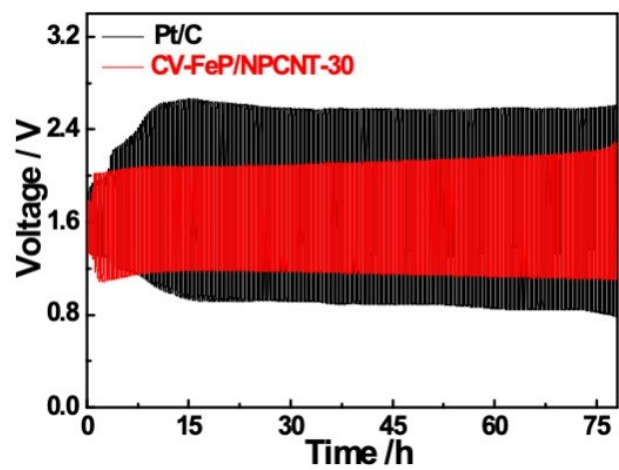

Fig. S5 Galvanostatic discharge-charge cycling performance of Pt/C and CV-FeP/NPCNT-30 based liquid ZABs.

## Tables

**Table S1** The elemental composition of NS-CNTs, FeP/NPCNT and CV-FeP/NPCNT-30 determined by XPS survey results

|                 | C (at%) | N (at%) | O (at%) | Fe (at%) | P (at%) |
|-----------------|---------|---------|---------|----------|---------|
| NS-CNTs         | 86.83   | 2.80    | 10.37   | 0        | 0       |
| FeP/NPCNT       | 74.84   | 4.63    | 15.31   | 0.68     | 4.54    |
| CV-FeP/NPCNT-30 | 80.24   | 4.52    | 11.97   | 0.45     | 2.82    |

**Table S2** The contents of different N bonding structures of NS-CNTs, FeP/NPCNT and CV-FeP/NPCNT-30 derived from high-resolution N 1s XPS spectra

|                 | pyridine-N (%) | pyrrolic-N (%) | graphitic-N (%) | oxidized-N (%) | Fe-N (%) |
|-----------------|----------------|----------------|-----------------|----------------|----------|
| NS-CNTs         | 23.3           | 27.0           | 23.7            | 26.0           | 0        |
| FeP/NPCNT       | 12.1           | 42.2           | 19.9            | 15.4           | 10.4     |
| CV-FeP/NPCNT-30 | 18.4           | 32.2           | 15.1            | 11.1           | 23.2     |

**Table S3** Electrochemical performances of CV-FeP/NPCNT-30 and some relevant catalysts for ORR tests in O<sub>2</sub>-saturated 0.1 mol L<sup>-1</sup> KOH electrolyte, and their based home-made liquid ZABs

| Samples                                                               | $E_{\text{onset}}$ /(V vs. RHE) | $E_{1/2}$ /(V vs. RHE) | $j_L$ /(mA cm <sup>-2</sup> ) | $n$   | $V_{\text{oc}}$ /(V vs. RHE) | Power density/(mW cm <sup>-2</sup> ) | Specific capacity/(mAh g <sup>-1</sup> ) | Ref.      |
|-----------------------------------------------------------------------|---------------------------------|------------------------|-------------------------------|-------|------------------------------|--------------------------------------|------------------------------------------|-----------|
| PFeC-900                                                              | 1.01                            | 0.88                   | 8.38                          | 3.97  | /                            | /                                    | /                                        | (1)       |
| FeCo/Co <sub>2</sub> P@NPCF                                           | 0.85                            | 0.79                   | 4.89                          | 3.85  | 1.44                         | 154                                  | /                                        | (2)       |
| 2D-FeP@FeNC-900                                                       | /                               | 0.84                   | 5.5                           | 3.60  | /                            | 260                                  | 803.7                                    | (3)       |
| FP <sub>0.6</sub> @CNP1000                                            | 0.93                            | 0.85                   | 5.41                          | 3.91  | 1.455                        | 80                                   | /                                        | (4)       |
| ZIF-8/Fe <sub>2</sub> P@CNT                                           | 0.92                            | 0.81                   | /                             | 3.99  | /                            | /                                    | /                                        | (5)       |
| FeP-NWCC                                                              | /                               | 0.86                   | 5.8                           | 3.77- | 1.50                         | 144                                  | 805.6                                    | (6)       |
| FePNS-G-2                                                             | /                               | /                      | /                             | ~4    | 1.493                        | 168                                  | 782.4                                    | (7)       |
| Fe-N-C NPC/CNT                                                        | /                               | 0.88                   | 6.5                           | 4.0   | 1.47                         | 201                                  | /                                        | (8)       |
| Fe <sub>3</sub> C/Fe <sub>2</sub> P@NC-N <sub>4</sub> Fe <sub>2</sub> | 1.03                            | 0.89                   | /                             | 3.9   | /                            | /                                    | /                                        | (9)       |
| FeP/NPC                                                               | 0.92                            | 0.82                   | /                             | 3.99  | /                            | /                                    | /                                        | (10)      |
| Fe-P/Cu <sub>3</sub> P-NPC                                            | /                               | 0.84                   | /                             | 3.88  | 1.39                         | 158.5                                | 815.3                                    | (11)      |
| NPC-10                                                                | 1.11                            | 0.89                   | 5.4                           | 3.9   | 1.47                         | 136.5                                | 659.5                                    | (12)      |
| FeP/NPCNT                                                             | 1.15                            | 0.868                  | 6.59                          | 3.92  | 1.48                         | 187                                  | 819.2                                    | This work |
| CV-FeP/NPCNT-30                                                       | 1.14                            | 0.920                  | 5.89                          | 3.99  | 1.528                        | 221                                  | 851.5                                    | This work |

## References

- (1) Norouzi, N.; Choudhury, F. A.; El-Kaderi, H. M. Iron Phosphide Doped, Porous Carbon as an Efficient Electrocatalyst for Oxygen Reduction Reaction. *ACS Appl. Energy Mater.* **2020**, *3* (3), 2537–2546. <https://doi.org/10.1021/acsaem.9b02250>.
- (2) Shi, Q.; Liu, Q.; Ma, Y.; Fang, Z.; Liang, Z.; Shao, G.; Tang, B.; Yang, W.; Qin, L.; Fang, X. High-Performance Trifunctional Electrocatalysts Based on FeCo/Co<sub>2</sub>P Hybrid Nanoparticles for Zinc–Air Battery and Self-Powered Overall Water Splitting. *Adv. Energy Mater.* **2020**, *10* (10), 1903854. <https://doi.org/10.1002/aenm.201903854>.
- (3) Tang, X.; Wu, Y.; Zhai, W.; Chu, T.; Li, L.; Huang, B.; Hu, T.; Yuan, K.; Chen, Y. Iron-Based Nanocomposites Implanting in N, P Co-Doped Carbon Nanosheets as Efficient Oxygen Reduction Electrocatalysts for Zn-Air Batteries. *Compos. Commun.* **2022**, *29*, 100994. <https://doi.org/10.1016/j.coco.2021.100994>.
- (4) Kang, Y.; Yan, P.; Yang, W.; Chen, B. Facile Synthesis of Nitrogen- and Phosphorus-Co-Doped Porous Carbon Nanosheets Embedded with FeP Clusters for the Oxygen Reduction Reaction Using Rechargeable Zinc-Air Batteries. *J. Electroanal. Chem.* **2022**, *909*, 116122. <https://doi.org/10.1016/j.jelechem.2022.116122>.
- (5) Liu, C.-C.; Chen, H.-Y.; Jhong, H.-P.; Chang, S.-T.; Wang, K.-C.; Chang, Y.-C.; Huang, H.-C.; Wang, C.-H. In-Situ Growth of Iron Phosphide Encapsulated by Carbon Nanotubes Decorated with Zeolitic Imidazolate Framework-8 for Enhancing Oxygen Reduction Reaction.

- Int. J. Hydrog. Energy* **2022**, *47* (39), 17367–17378. <https://doi.org/10.1016/j.ijhydene.2022.03.228>.
- (6) Zhang, P.; Liu, Y.; Wang, S.; Zhou, L.; Liu, T.; Sun, K.; Cao, H.; Jiang, J.; Wu, X.; Li, B. Wood-Derived Monolithic Catalysts with the Ability of Activating Water Molecules for Oxygen Electrocatalysis. *Small* **2022**, *18* (34), 2202725. <https://doi.org/10.1002/smll.202202725>.
- (7) Nam, D.; Kim, J. Fe, P, N, S Multidoping Porous Graphene Material as a Bifunctional OER/ORR Electrocatalytic Activity for Enhancing Rechargeable Zn-Air Batteries. *Ionics* **2022**, *28* (10), 4719–4728. <https://doi.org/10.1007/s11581-022-04702-4>.
- (8) Sheng, J.; Sun, S.; Jia, G.; Zhu, S.; Li, Y. Doping Effect on Mesoporous Carbon-Supported Single-Site Bifunctional Catalyst for Zinc – Air Batteries. *ACS Nano* **2022**, *16* (10), 15994–16002. <https://doi.org/10.1021/acsnano.2c03565>.
- (9) Chu, C.; Liu, J.; Wei, L.; Feng, J.; Li, H.; Shen, J. Iron Carbide and Iron Phosphide Embedded N-Doped Porous Carbon Derived from Biomass as Oxygen Reduction Reaction Catalyst for Microbial Fuel Cell. *Int. J. Hydrog. Energy* **2023**, *48* (11), 4492–4502. <https://doi.org/10.1016/j.ijhydene.2022.10.262>.
- (10) Xu, L.-H.; Che, P.-C.; Zhang, X.-J.; Cosnier, S.; Shan, D. FeP Nanoparticles Highly Dispersed on N,P-Doped Petaloid Carbon Nanosheet: Interface Engineering and Boosted Intrinsic ORR Activity. *Appl. Surf. Sci.* **2023**, *620*, 156770. <https://doi.org/10.1016/j.apsusc.2023.156770>.
- (11) Yang, X.; Wang, F.; Jing, Z.; Chen, M.; Wang, B.; Wang, L.; Qu, G.; Kong, Y.; Xu, L. A General “In Situ Etch-Adsorption-Phosphatization” Strategy for the Fabrication of Metal Phosphides/Hollow Carbon Composite for High Performance Liquid/Flexible Zn–Air Batteries. *Small* **2023**, *19* (38), 2301985. <https://doi.org/10.1002/smll.202301985>.
- (12) Zhang, J.; Gong, T.; Liu, R.; Xu, H.; Zhang, Y.; Hou, L.; Yuan, C. Metal-Organic Framework Derived Porous N, P Co-Doping Carbon Microcubes toward Aqueous and Flexible Quasi-Solid-State Rechargeable Zn-Air Batteries. *Mater. Today Chem.* **2023**, *34*, 101801. <https://doi.org/10.1016/j.mtchem.2023.101801>.
